# Supplementary material for: Modified perylene diimide for femto molar level detection of glucose: smartphone-assisted colorimetric glucose detection kits
Source: Royal Society of Chemistry journal article supplement (doi:10.1039/d4tb01879f), 2024-01-01
Supplement: d4tb01879f1.pdf [file d4tb01879f1.pdf]

## SUPPORTING INFORMATION

For

### **Modified perylene diimide for *femto* molar level detection of glucose: Smartphone assisted colorimetric glucose detection kits**

Rajdeep Kaur<sup>a</sup>, Sanjeev Kumar<sup>b</sup>, Siyu Liu<sup>b</sup>, Kapil Kumar<sup>b</sup>, Junsheng Chen<sup>b</sup> and Prabhpreet Singh<sup>a\*</sup>

<sup>a</sup>Department of Chemistry, UGC Centre for Advanced Studies-II, Guru Nanak Dev University, Amritsar 143001 (pb.)-India

<sup>b</sup>Nano-Science Center & Department of Chemistry, University of Copenhagen, Copenhagen, 2100 Denmark

E-mail: [prabhpreet.chem@gndu.ac.in](mailto:prabhpreet.chem@gndu.ac.in); M: +91 8427101534

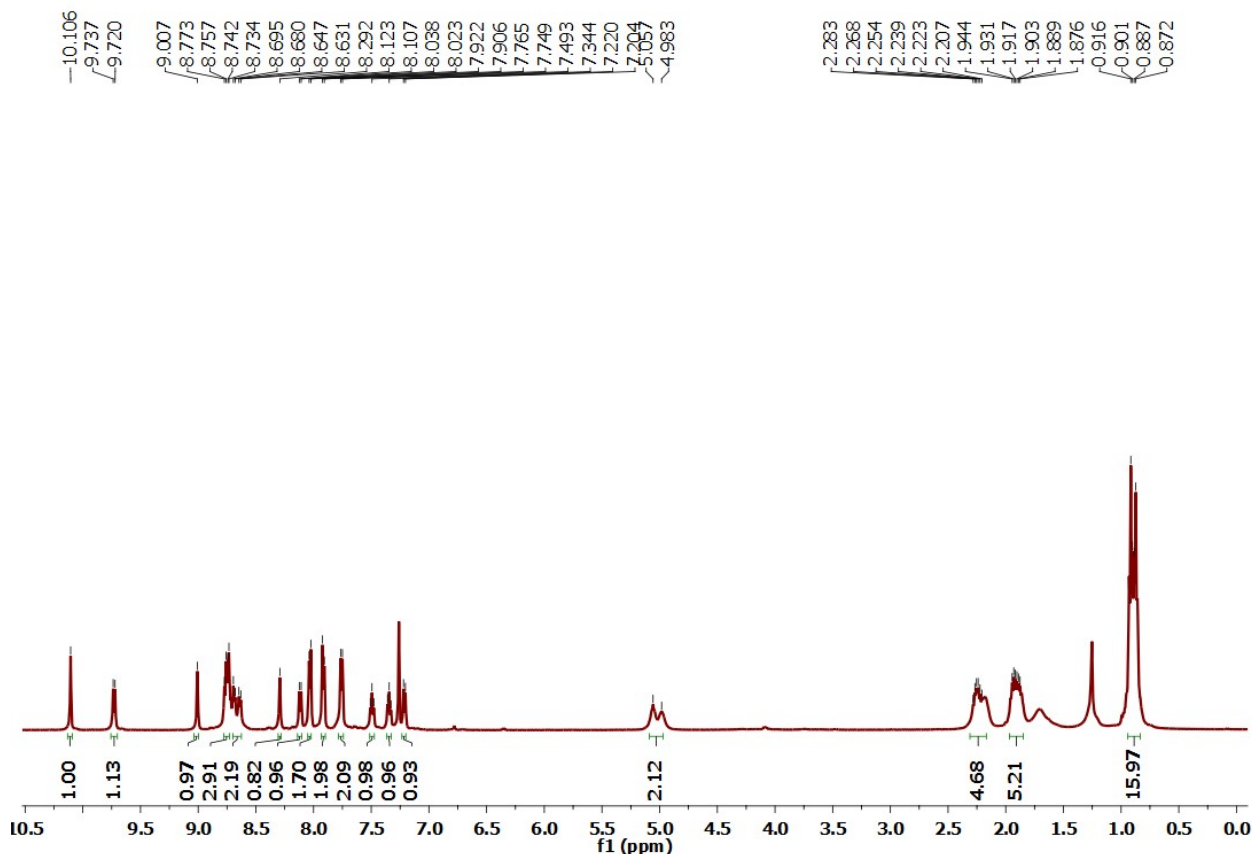

Figure S1. <sup>1</sup>H NMR spectrum of PH1.

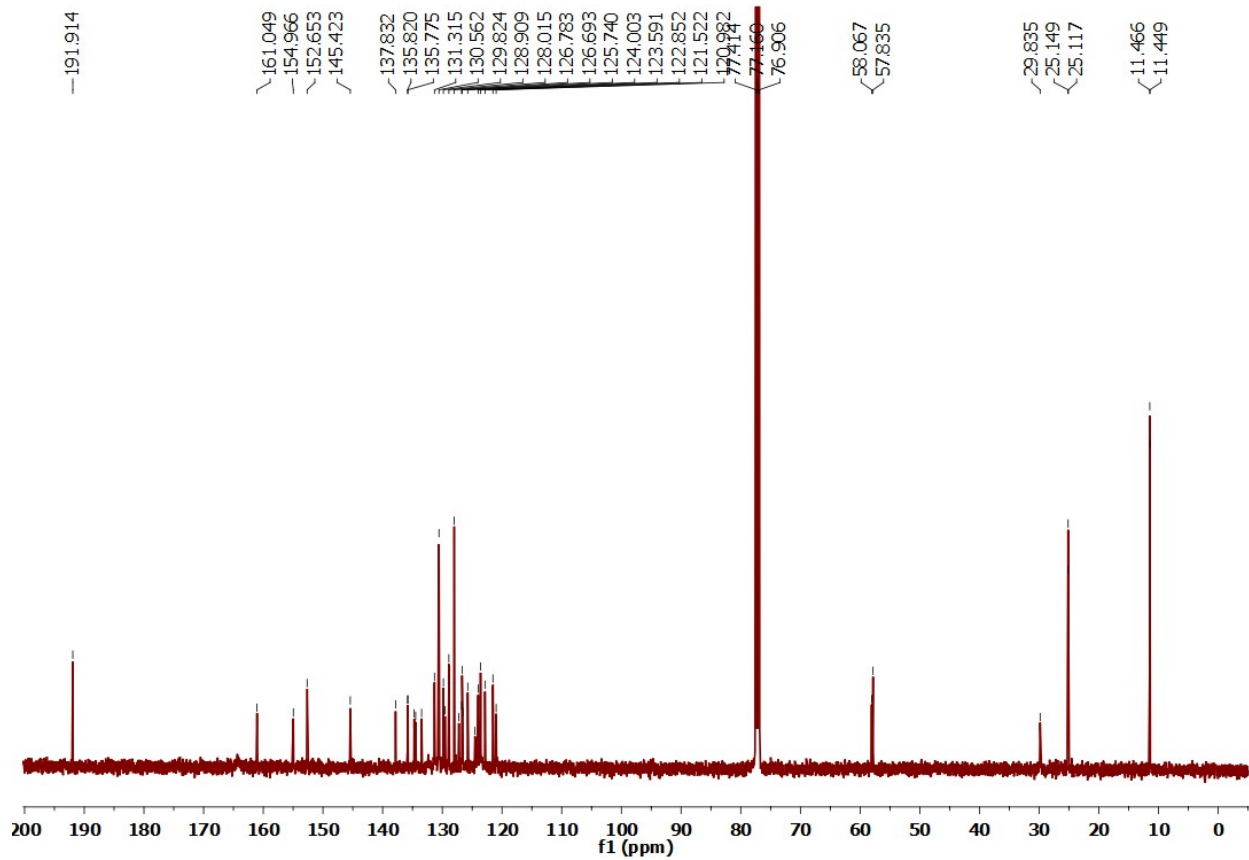

Figure S2.  $^{13}\text{C}$  NMR spectrum of PH1.

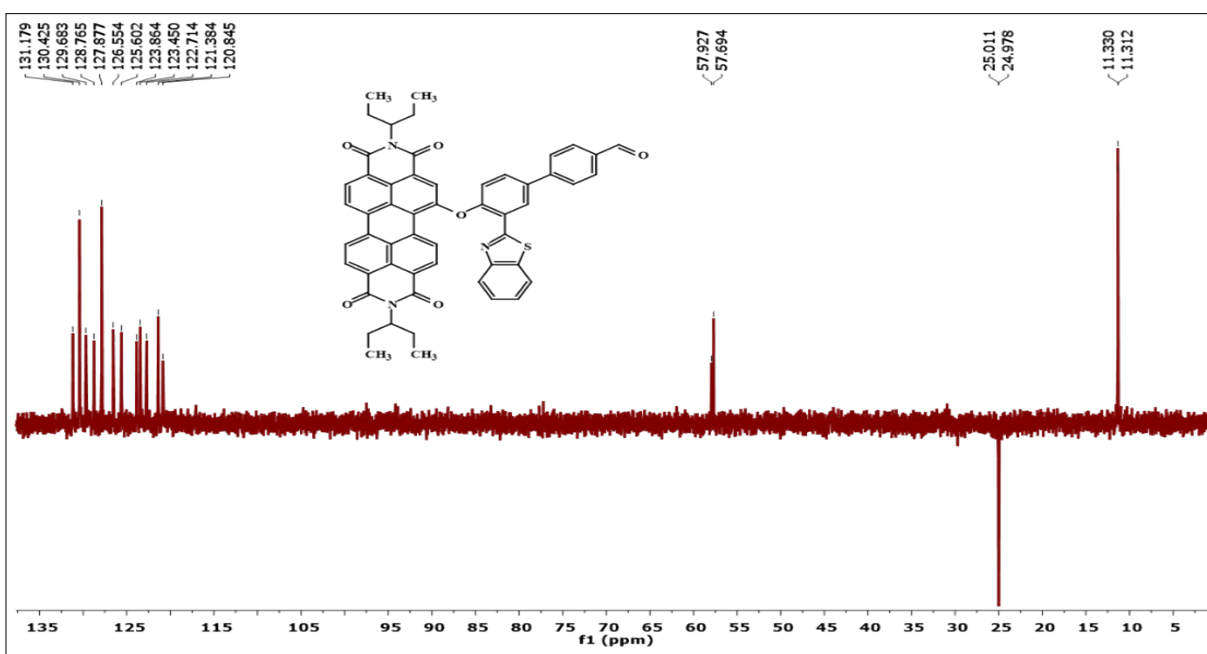

Figure S3.  $^{13}\text{C}$  DEPT NMR spectrum of PH1.

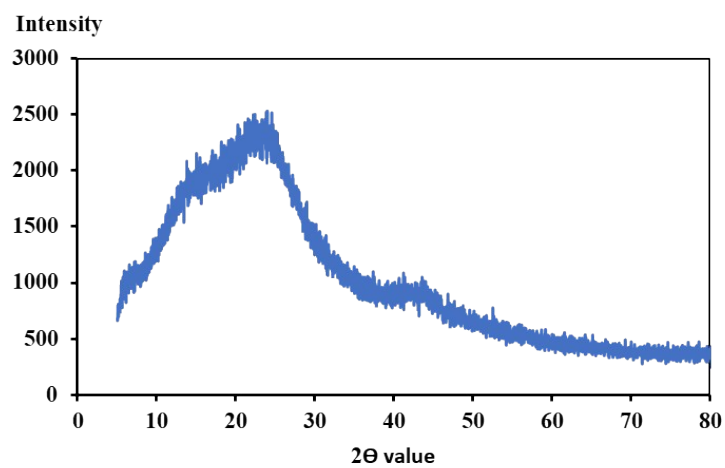

Figure S4: XRD spectrum of PH1.

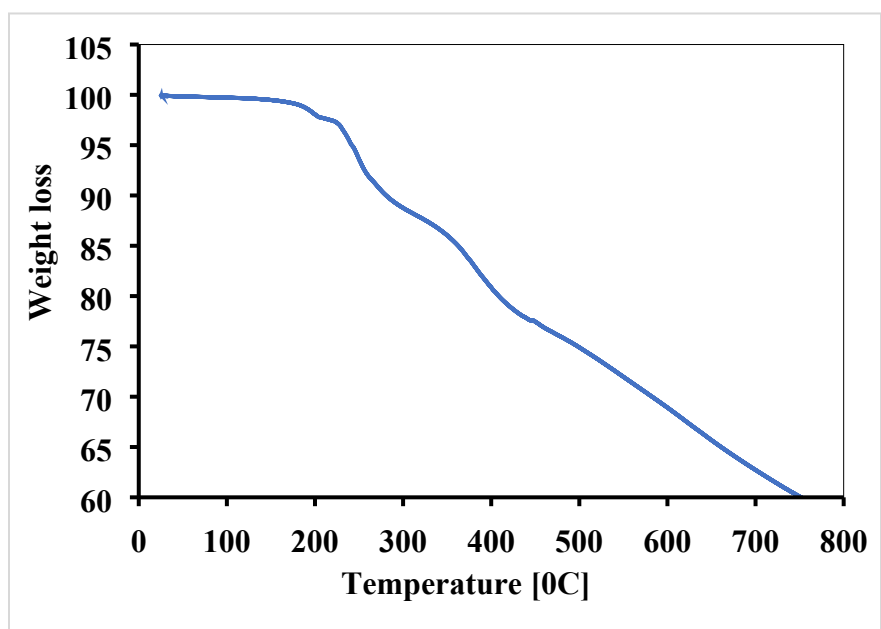

Figure S4a: TGA graph of PH1

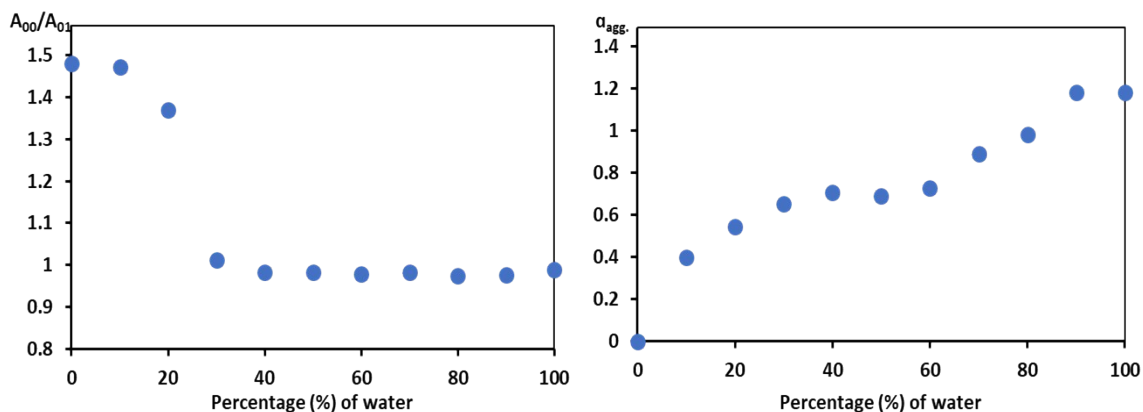

**Figure S5.** Plot of (left)  $A_{0-0}/A_{0-1}$  and (right) degree of aggregation ( $\alpha_{agg}$ ) versus percentage of water in a DMSO.

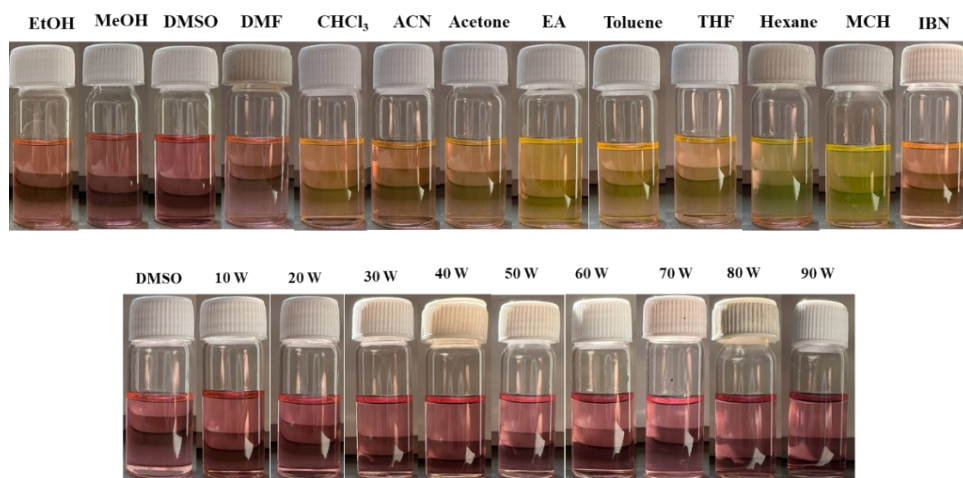

**Figure S6.** Daylight photographs of PH1 (10  $\mu$ M) in (top) different polarity solvents and (bottom) upon addition of different water fractions in DMSO.

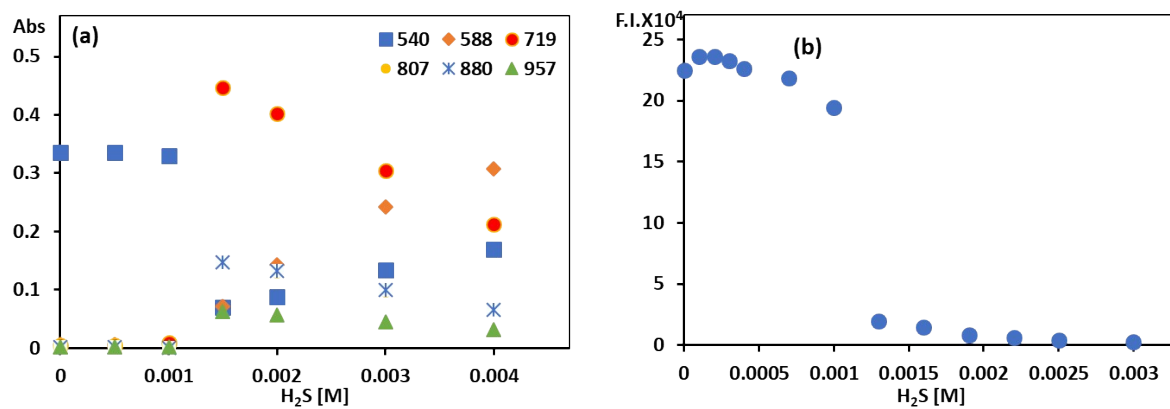

**Figure S7.** (a) Absorbance (at different wavelengths) and (b) emission plot of PH1 upon addition of different concentrations of  $H_2S$ .

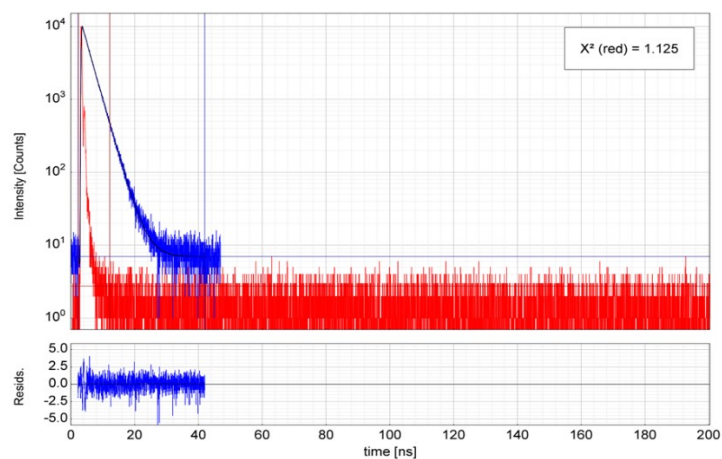

**Figure S8:** The fluorescence lifetime of PH1.

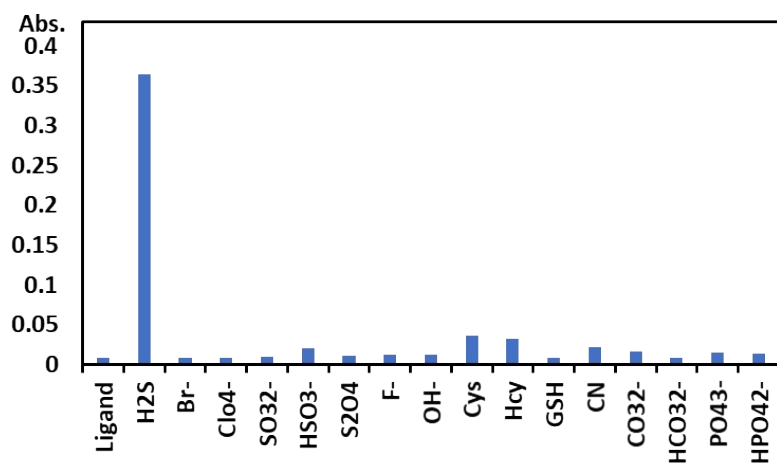

**Figure S9.** Bar graph of PH1 (10  $\mu$ M) upon addition of 1mM concentration of different anions.

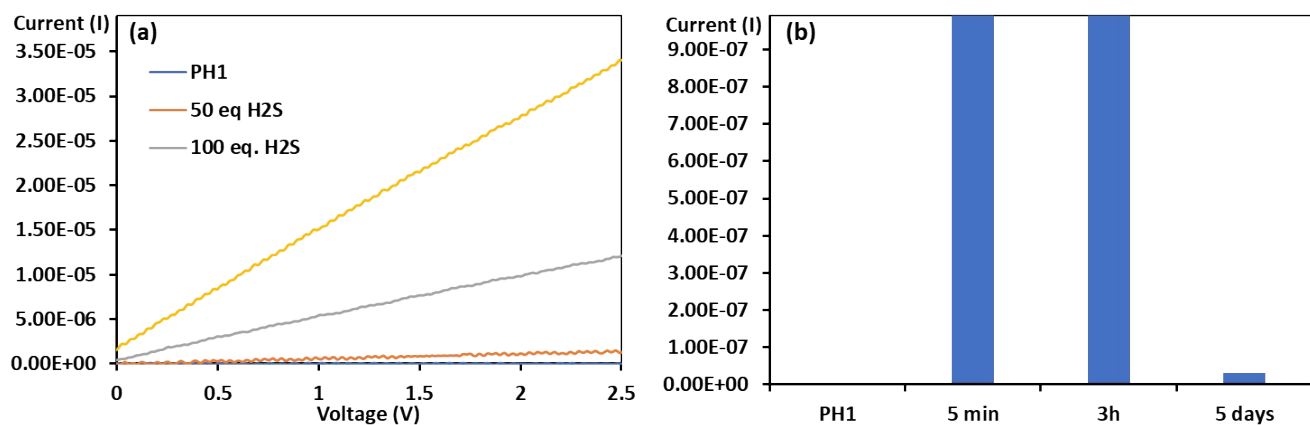

**Figure S10.** (a) I-V plot of PH1 (10  $\mu$ M) upon addition of H<sub>2</sub>S. (b) Bar graph of I-V plot showing stability of PH1<sup>-</sup> radical anion after different interval of time.

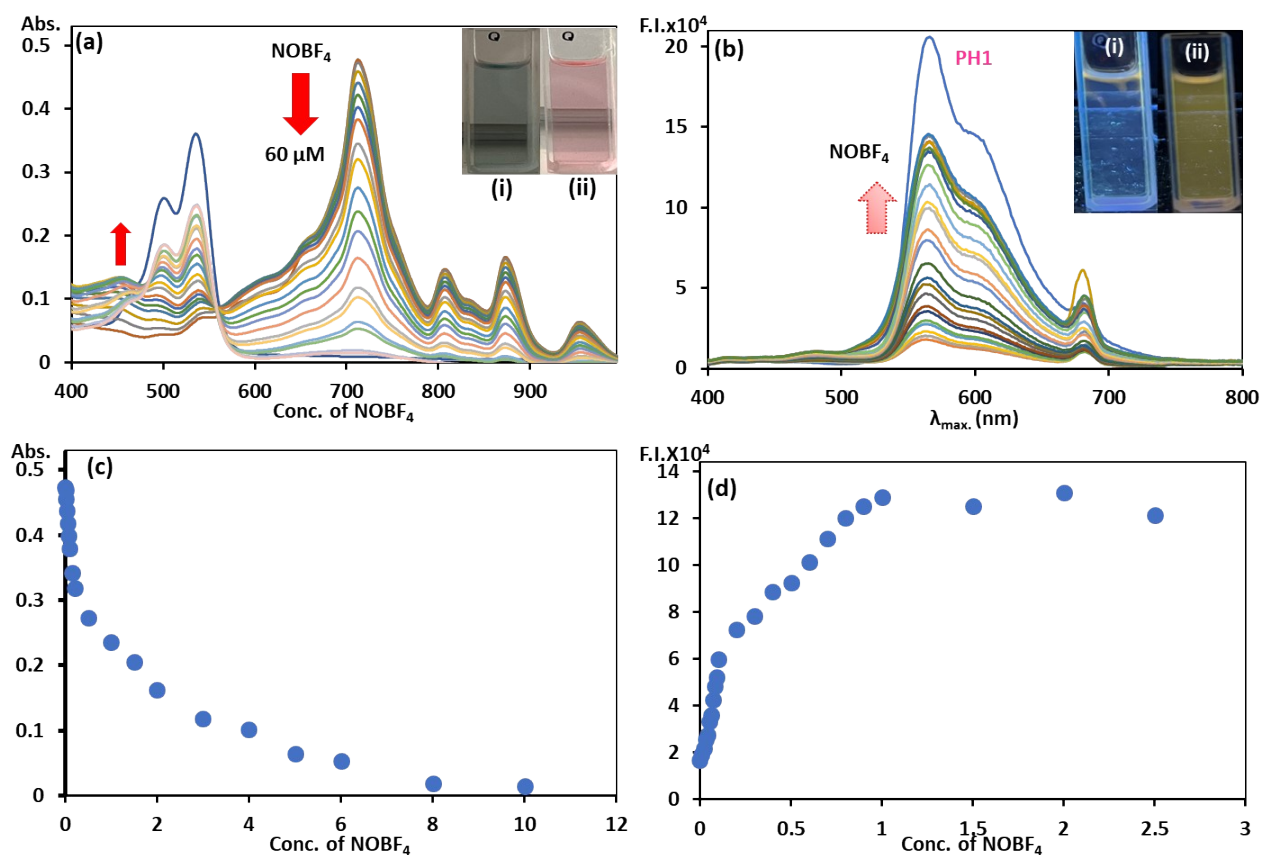

**Figure S11:** (a) Absorbance and (b) Emission spectra of  $\text{PH1}^-$  (generated in-situ upon addition of 1mM of  $\text{H}_2\text{S}$ ) upon addition of different concentration of  $\text{NOBF}_4$ ; [Insets of (a) and (b)] colour change photographs of  $\text{PH1}^-$  upon addition of 100  $\mu\text{M}$  concentrations of  $\text{NOBF}_4$ . Plots of (c) Absorbance (d) emission intensity versus concentration of  $\text{NOBF}_4$  to calculate the lowest limit of detections.

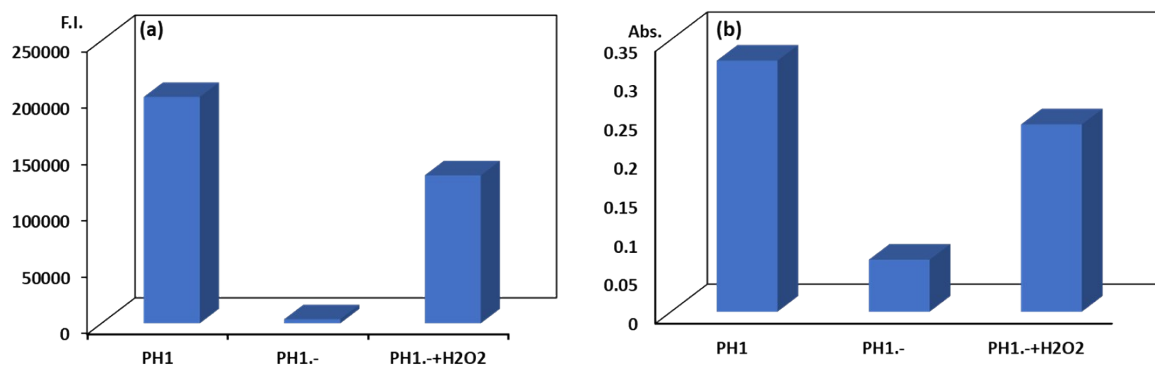

**Figure S12.** Bar graph showing revival of (a) emission (b) absorbance intensity upon addition of  $\text{H}_2\text{O}_2$  to  $\text{PH1}^-$  radical anion

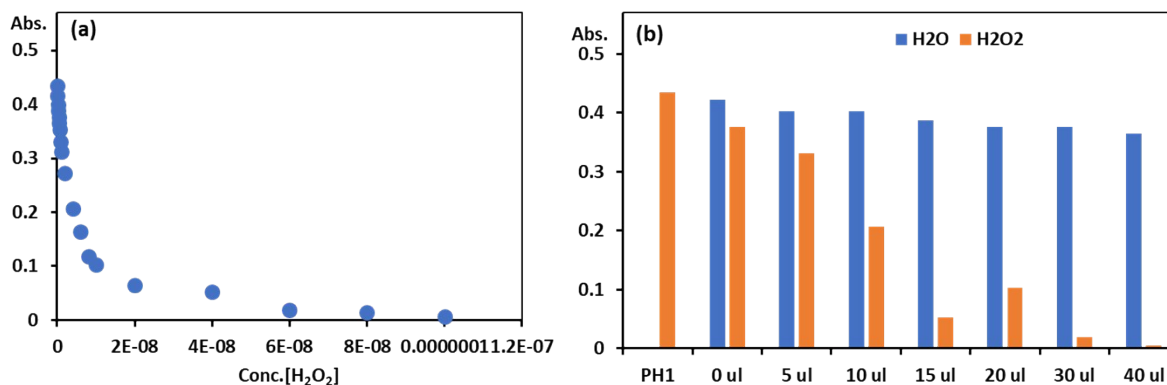

**Figure S13.** (a) Plot of absorbance intensity versus concentration of  $H_2O_2$  and (b) Bar graph of  $PH1^-$  (generated in-situ upon addition of 1 mM of  $H_2S$ ) showing interference of water upon addition of  $H_2O_2$ .

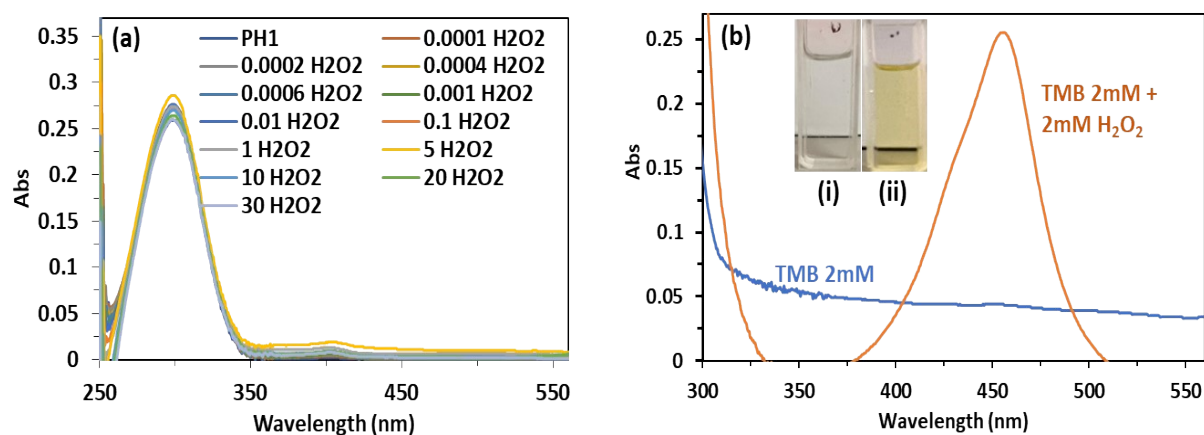

**Figure S14:** (a,b) Absorbance spectrum of 3,3',5,5'-tetramethylbenzidine (TMB) upon addition of different concentration of  $H_2O_2$ .

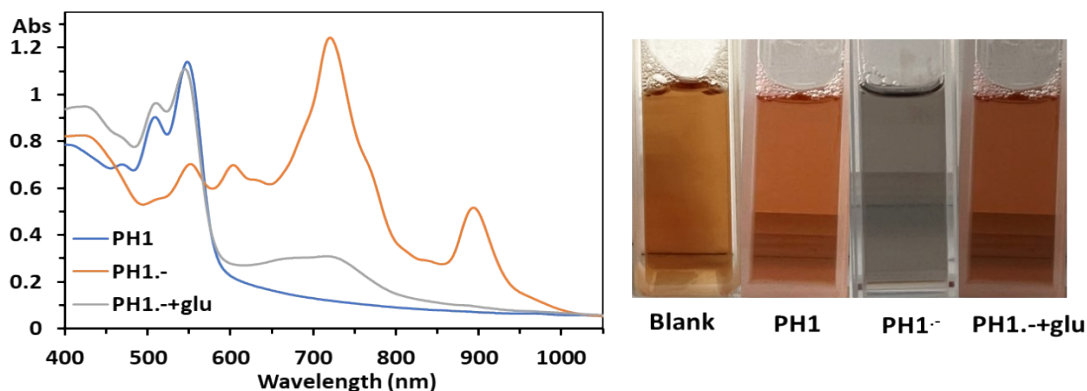

**Figure S15:** The absorbance spectra of PH1 upon addition of  $H_2S$ , glucose oxidase and glucose in the whole blood.

**Table S1:** The comparison of PDI-based material with other materials.

| <b>Citation</b>                                      | <b>Radical anion</b> | <b>Solvent mixture</b> | <b>Analytes</b>                                             | <b>LOD(M)</b>     | <b>Application</b>        |
|------------------------------------------------------|----------------------|------------------------|-------------------------------------------------------------|-------------------|---------------------------|
| Present manuscript                                   | <b>YES</b>           | 20% HEPES Buffer       | H <sub>2</sub> O <sub>2</sub> /<br>Glucose/                 | 170 fM/<br>85 fM/ | Biochemical assay         |
| Dyes and Pigments 165 (2019) 319–326                 | Yes                  | NMP                    | Ag <sup>+</sup>                                             | 0.05 mol/L        | NA                        |
| Chem. Commun., 2023, 59, 12775                       | No                   | 60% PBS buffer         | H <sub>2</sub> O <sub>2</sub>                               | 1.37 μM           | Live cell                 |
| ACS Appl. Mater. Interfaces 2023, 15, 39–47          | No                   | 1% PBS                 | H <sub>2</sub> O <sub>2</sub>                               | 87 nM             | In-vivo, In-vitro imaging |
| Sensors and Actuators: B. Chemical 406 (2024) 135452 | No                   | 1% PBS                 | H <sub>2</sub> O <sub>2</sub> (in presence of Aβ42 fibrils) | 38.8 nM           | In-vivo, In-vitro imaging |



|                                                                                       |    |                             |                               |          |                           |
|---------------------------------------------------------------------------------------|----|-----------------------------|-------------------------------|----------|---------------------------|
| Spectrochimica Acta Part A: Molecular and Biomolecular Spectroscopy 304 (2024) 123394 | No | 70% PBS buffer              | H <sub>2</sub> O <sub>2</sub> | 3.01 μM  | In cells                  |
| ACS Omega 2021, 6, 14819–14823                                                        | No | PBS Buffer                  | H <sub>2</sub> O <sub>2</sub> | 0–200 μM | NA                        |
| Talanta 269 (2024) 125459                                                             | No | PBS buffer                  | H <sub>2</sub> O <sub>2</sub> | 25.2 nM  | In-vivo, in-vitro imaging |
| Talanta 271 (2024) 125669                                                             | No | EtOH/PB solution (1:1, v/v) | H <sub>2</sub> O <sub>2</sub> | 62 nM    | In-vivo, in-vitro imaging |
